# Supplementary material for: Physicochemical, self-assembly and field-effect transistor properties of anti- and syn- thienoacene isomers
Source: Royal Society of Chemistry journal article supplement (doi:10.1039/c0jm04583g), 2011-01-01
Supplement: c0jm04583g.pdf [file c0jm04583g.pdf]

Supplementary Information  
**Physicochemical, self-assembling and field-effect transistor properties of two thienoacene isomers**

Rongjin Li,<sup>ab</sup> Huanli Dong,<sup>a</sup> Xiaowei Zhan,<sup>\*a</sup> Hongxiang Li,<sup>\*b</sup> Shu-Hao Wen,<sup>c</sup> Wei-Qiao Deng,<sup>\*c</sup> Ke-Li Han,<sup>c</sup> and Wenping Hu<sup>\*a</sup>

<sup>a</sup> Beijing National Laboratory for Molecular Sciences, Key Laboratory of Organic Solids, Institute of Chemistry, Chinese Academy of Sciences, Beijing, P. R. China. E-mail: huwp@iccas.ac.cn; xwzhan@iccas.ac.cn

<sup>b</sup> Shanghai Institute of Organic Chemistry, Chinese Academy of Sciences, Shanghai, P. R. China.

<sup>c</sup> State Key Laboratory of Molecular Reaction Dynamics, Dalian Institute of Chemical Physics, Chinese Academy of Sciences, Dalian, P. R. China.

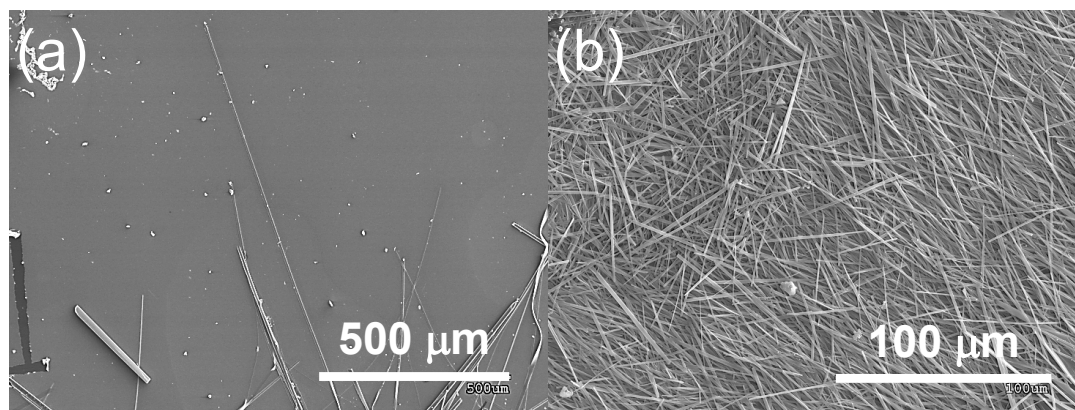

**Fig. S1** SEM images of solution self-assembled 1D wires of the *syn* isomer. (a) one wire with length exceeds 1 mm. (b) large area wires.

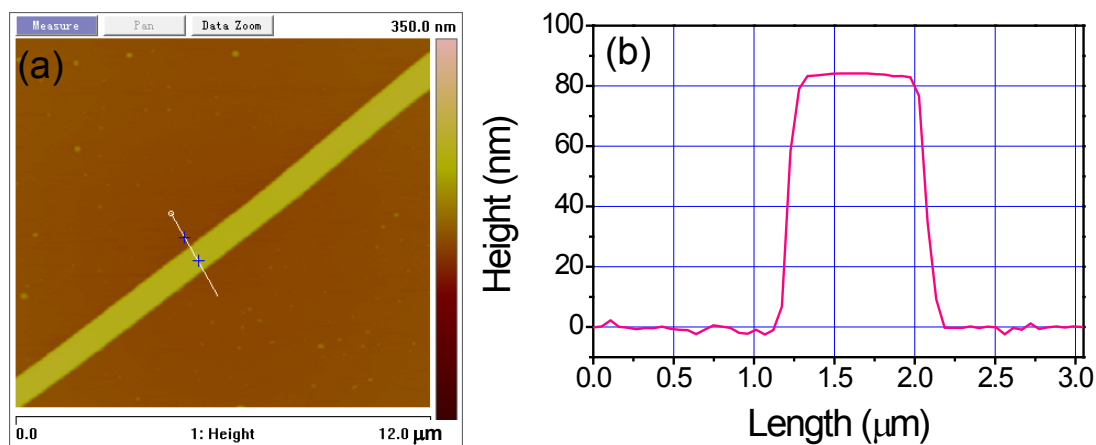

**Fig. S2** (a) AFM image of an individual wire of the *syn* isomer and (b) the corresponding section analysis. The height is less than 100 nm.

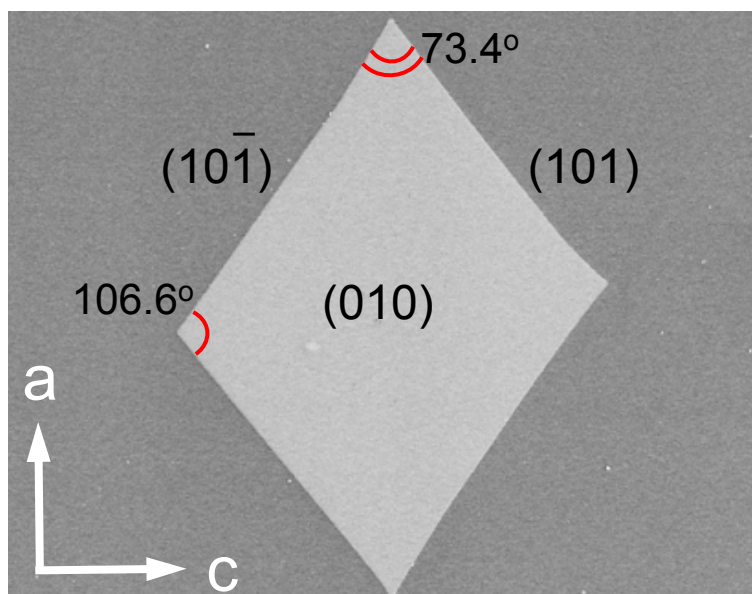

**Fig. S3** SEM image of a single crystal of the *anti* isomer. The planes were indexed by its single crystal structures according to the law of consistency of interfacial angles.

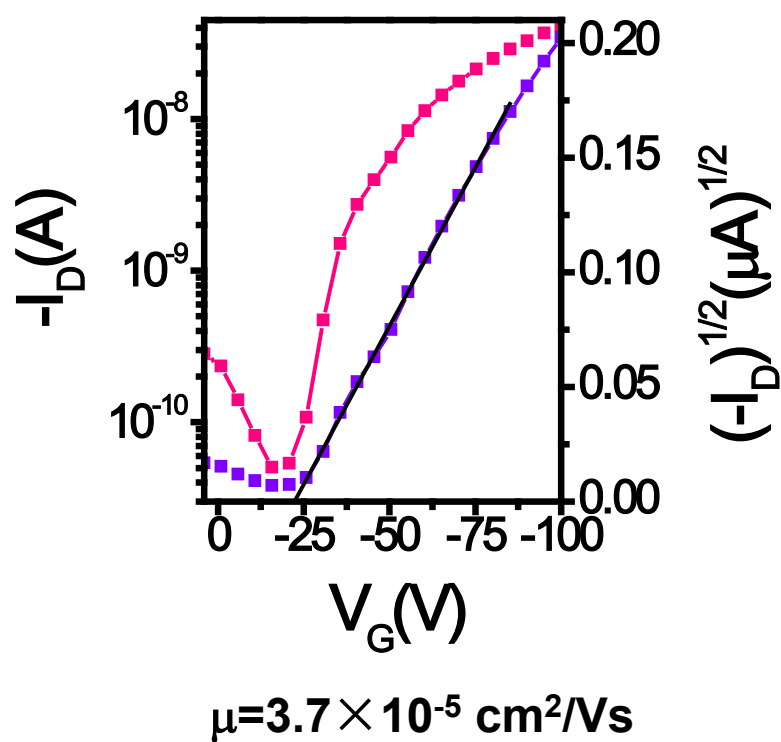

**Fig. S4** Typical transfer curve of evaporated thin film of the *syn* isomer. The mobility was in the order of  $10^{-5} \text{ cm}^2/\text{Vs}$ .
